# Supplementary material for: Impact of KIR-HLA Genotype on Natural-Killer-Cell-Based Immunotherapy for Preventing Hepatocellular Carcinoma after Living-Donor Liver Transplantation
Source: MDPI journal article supplement (doi:10.3390/cancers16030533), 2024-01-26
Supplement: s1 [file s1]

Table S1

## Clinicopathological characteristics of patients in this study

| Variables                                              | Radiologically within Milan criteria (MC)<br>n= 66 |                                   | Radiologically beyond MC<br>n= 11 |
|--------------------------------------------------------|----------------------------------------------------|-----------------------------------|-----------------------------------|
|                                                        | Pathologically within MC<br>n= 43                  | Pathologically beyond MC<br>n= 23 |                                   |
| Age                                                    | 58 (46- 69)                                        | 58 (45- 68)                       | 58 (44- 68)                       |
| Gender (male/ female)                                  | 32/ 11                                             | 14/ 9                             | 8/ 3                              |
| Primary disease (viral/ autoimmune/ others)            | 35/ 2/ 6                                           | 21/ 1/ 1                          | 7/ 0/ 4                           |
| Blood type incompatibility (yes/ no)                   | 5/ 38                                              | 3/ 20                             | 2/ 9                              |
| Donor relation (1st degree relatives/ others)          | 36/ 7                                              | 19/ 4                             | 8/ 3                              |
| Immunological desensitization (yes/ no)                | 5/36                                               | 4/ 19                             | 9/ 2                              |
| MELD score                                             | 13 (7- 37)                                         | 12 (6- 21)                        | 15 (6- 31)                        |
| Treatment period for HCC before transplantation (year) | 0.8 (0- 7.5)                                       | 1.8 (0- 9.8)                      | 1.1 (0.1-8.0)                     |
| Number of LRT for HCC before transplantation           | 1 (0- 4)                                           | 2 (0- 14)                         | 2 (0- 6)                          |
| Des-gamma carboxyprothrombin (AU/ml)                   | 32 (10- 26484)                                     | 82 (10- 10950)                    | 78 (10- 640)                      |
| Alpha-fetoprotein (ng/ml)                              | 6.3 (1.5- 686.7)                                   | 33.9 (3.7- 5384)                  | 18.2 (5- 991.2)                   |
| Radiological tumor number                              | 1 (0*- 3)                                          | 2 (0*-3)                          | 8 (1- 15)                         |
| Radiological tumor diameter (cm)                       | 1.5 (0*- 4.5)                                      | 2.3 (0*- 4)                       | 2.5 (1- 8)                        |
| Pathological assessment                                |                                                    |                                   |                                   |
| Poorly differentiated HCC (-/+)                        | 41/ 2                                              | 22/ 1                             | 9/ 2                              |
| Pathological tumor number                              | 2 (0**- 3)                                         | 6 (1- 47)                         | 5 (0**- 15)                       |
| Pathological tumor diameter (cm)                       | 1.6 (0**- 4.5)                                     | 2.3 (0.9- 6.3)                    | 3.0 (0**- 8.4)                    |
| Pathological microvascular invasion (-/ +)             | 43/ 0                                              | 14/ 9                             | 9/ 2                              |
| Adjuvant immunotherapy (-/ +)                          | 27/ 17                                             | 9/ 14                             | 4/ 7                              |

\* Radiologically suspected to be unviable due to prior loco-regional therapy

\*\* Defined as complete necrosis by pathological assessment

Table S2

## Clinicopathological characteristics of patients receiving the immunotherapy with donor liver-derived NK cells

|                                                           | With immunotherapy<br>n=38 | Without immunotherapy<br>n=39 | p value |
|-----------------------------------------------------------|----------------------------|-------------------------------|---------|
| Age                                                       | 58 (44- 68)                | 58 (45- 69)                   | 0.650   |
| Gender (male/ female)                                     | 25/ 13                     | 30/ 9                         | 0.279   |
| Primary disease (viral/ autoimmune/ others)               | 32/2/4                     | 31/1/7                        | 0.557   |
| Blood type incompatibility (yes/ no)                      | 4/ 34                      | 7/ 32                         | 0.586   |
| Donor relation (1st degree relatives/ others)             | 32/ 6                      | 31/ 8                         | 0.591   |
| Immunological desensitization (yes/ no)                   | 5/ 33                      | 9/ 30                         | 0.256   |
| MELD score                                                | 12 (6-29)                  | 13 (6-37)                     | 0.146   |
| Treatment period for HCC before transplantation (year)    | 1.1 (0- 5.4)               | 0.8 (0- 9.8)                  | 0.915   |
| Number of LRT for HCC before transplantation              | 2 (0- 8)                   | 1 (0- 14)                     | 0.366   |
| Des-gamma carboxyprothrombin (AU/ml)                      | 76.5(10-20805)             | 31 (10-26484)                 | 0.062   |
| Alpha-fetoprotein (ng/ml)                                 | 12.7 (3.2-5384)            | 6.9 (1.5- 4121)               | 0.860   |
| Radiological tumor number                                 | 2 (0*- 15)                 | 1 (0*- 10)                    | 0.001   |
| Radiological tumor diameter (cm)                          | 2.0(0*- 5.0)               | 1.7 (0*- 8)                   | 0.191   |
| Radiological Milan criteria (MC) (within/ beyond)         | 31/7                       | 35/ 4                         | 0.306   |
| Pathological assessment                                   |                            |                               |         |
| Poorly differentiated HCC (-/+)                           | 33/ 5                      | 39/ 0                         | 0.007   |
| Pathological tumor number                                 | 3 (0**- 15)                | 2 (0**- 47)                   | 0.014   |
| Pathological tumor diameter (cm)                          | 2.2 (0**- 6.3)             | 1.8 (0**- 8.4)                | 0.116   |
| Pathological microvascular invasion (-/ +)                | 30/ 8                      | 36/ 3                         | 0.118   |
| Pathological MC (within/ beyond)/Radiologically beyond MC | 17/ 14 / 7                 | 26/ 9/ 4                      | 0.149   |

\* Radiologically suspected to be unviable due to prior loco-regional therapy

\*\* Defined as complete necrosis by pathological assessment

Table S3

## Clinicopathological characteristics of patients according to recipient-licensed NK cell genotype

|                                                        | Recipient<br>poorly licensed<br>NK genotype<br>n= 57 | Recipient<br>highly licensed<br>NK genotype<br>n= 20 | P value |
|--------------------------------------------------------|------------------------------------------------------|------------------------------------------------------|---------|
| Age                                                    | 60 (50- 68)                                          | 57 (44- 69)                                          | 0.14    |
| Gender (male/ female)                                  | 43/ 14                                               | 12/ 8                                                | 0.20    |
| Primary disease (viral/ autoimmune/ others)            | 45/ 3 / 9                                            | 18/ 0 / 2                                            | 0.30    |
| Blood type incompatibility (yes/ no)                   | 47/ 10                                               | 19/ 1                                                | 0.13    |
| Donor relation (1st degree relatives/ others)          | 45/ 12                                               | 18/ 2                                                | 0.25    |
| Immunological desensitization (yes/ no)                | 11/ 46                                               | 3/ 17                                                | 0.66    |
| MELD score                                             | 13 (6- 37)                                           | 13 (7 -31)                                           | 0.57    |
| Treatment period for HCC before transplantation (year) | 0.82 (0.10- 8.34)                                    | 1.37 (0- 9.80)                                       | 0.94    |
| Number of LRT for HCC before transplantation           | 1 (0-9)                                              | 1 (0-14)                                             | 0.51    |
| Des-gamma carboxyprothrombin (AU/ml)                   | 43 (10-4678)                                         | 70 (12-26484)                                        | 0.25    |
| Alpha-fetoprotein (ng/ml)                              | 5 (1.5- 991.2)                                       | 23.9 (3,1- 5384)                                     | 0.09    |
| Radiological tumor number                              | 1 (0*-15)                                            | 2 (0*-8)                                             | 0.62    |
| Radiological tumor diameter (cm)                       | 2 (0*-5)                                             | 1.68 (0*-8)                                          | 0.62    |
| Adjuvant immunotherapy (-/ +)                          | 28/ 29                                               | 11/ 9                                                | 0.65    |
| Pathological assessment                                |                                                      |                                                      |         |
| Poorly differentiated HCC (-/+)                        | 53/ 4                                                | 19/ 1                                                | 0.75    |
| Pathological tumor number                              | 3 (0**-37)                                           | 2 (0**-47)                                           | 0.10    |
| Pathological tumor diameter (cm)                       | 2.1 (0**-6.3)                                        | 1.55 (0**-8.4)                                       | 0.27    |
| Pathological microvascular invasion (-/ +)             | 50/ 7                                                | 16/ 4                                                | 0.41    |

\* Radiologically suspected to be unviable due to prior loco-regional therapy

\*\* Defined as complete necrosis by pathological assessment

Table S4

# Tumor characteristics and KIR-HLA combination genotype in patients at risk of HCC recurrence

|                                      |     | Immunotherapy | Prognosis                 | HLA-KIR genotype assessment    |                          |                                    | Preoperative assessment   |                                  |           |           | Pathological assessment |                           |                                  |                         |
|--------------------------------------|-----|---------------|---------------------------|--------------------------------|--------------------------|------------------------------------|---------------------------|----------------------------------|-----------|-----------|-------------------------|---------------------------|----------------------------------|-------------------------|
|                                      |     |               | Time to recurrence (year) | Recipient licensed NK genotype | Donor licensed NK status | Number of receptor-ligand mismatch | Radiological tumor number | Radiological tumor diameter (cm) | AFP ng/ml | DPC AU/ml | Histological diagnosis  | Pathological tumor number | Pathological tumor diameter (cm) | Micro vascular invasion |
| Pathologically beyond Milan criteria | #1  | -             | 0.7                       | Highly                         | Highly                   | 2                                  | 1                         | 2.7                              | 917.5     | 13        | Mod                     | 1                         | 3.7                              | +                       |
|                                      | #2  | -             | 2.5                       | Poorly                         | Highly                   | 2                                  | 0                         | 0                                | 13.4      | 98        | Mod                     | 4                         | 1.8                              | -                       |
|                                      | #3  | -             | 1.2                       | Highly                         | Poorly                   | 1                                  | 1                         | 1.8                              | 4121      | 130       | Mod                     | 47                        | 1.0                              | -                       |
|                                      | #4  | -             | NR                        | Poorly                         | Poorly                   | 2                                  | 1                         | 1.0                              | 5.6       | 12        | Mod                     | 25                        | 0.9                              | -                       |
|                                      | #5  | -             | NR                        | Poorly                         | Poorly                   | 2                                  | 3                         | 2.5                              | 6.5       | 31        | Mod                     | 6                         | 2.3                              | -                       |
|                                      | #6  | -             | NR                        | Poorly                         | Poorly                   | 2                                  | 2                         | 2.3                              | 33.9      | 11        | Mod                     | 37                        | 3.2                              | -                       |
|                                      | #7  | -             | NR                        | Poorly                         | Poorly                   | 2                                  | 1                         | 4.0                              | 43.5      | 858       | Mod                     | 3                         | 2.9                              | +                       |
|                                      | #8  | -             | NR                        | Poorly                         | Poorly                   | 2                                  | 3                         | 1.0                              | 44.8      | 4678      | Mod                     | 10                        | 2.1                              | -                       |
|                                      | #9  | -             | NR                        | Poorly                         | Poorly                   | 2                                  | 1                         | 2.0                              | 128.7     | 26        | Mod                     | 4                         | 2.0                              | -                       |
|                                      | #10 | +             | NR                        | Highly                         | Highly                   | 1                                  | 2                         | 2.9                              | 2578      | 24        | Mod                     | 2                         | 4.5                              | -                       |
|                                      | #11 | +             | NR                        | Poorly                         | Highly                   | 2                                  | 1                         | 3.3                              | 4.2       | 10        | Mod                     | 7                         | 3.0                              | -                       |
|                                      | #12 | +             | NR                        | Poorly                         | Highly                   | 2                                  | 2                         | 1.0                              | 231.4     | 110       | Mod                     | 7                         | 1.4                              | -                       |
|                                      | #13 | +             | NR                        | Highly                         | Poorly                   | 1                                  | 3                         | 2.6                              | 11.6      | 10950     | Por                     | 3                         | 2.5                              | +                       |
|                                      | #14 | +             | NR                        | Highly                         | Poorly                   | 1                                  | 3                         | 2.8                              | 32.8      | 3026      | Mod                     | 2                         | 4.0                              | +                       |
|                                      | #15 | +             | 1                         | Highly                         | Poorly                   | 1                                  | 3                         | 1.7                              | 5384      | 545       | Mod                     | 13                        | 2.2                              | +                       |
|                                      | #16 | +             | NR                        | Poorly                         | Poorly                   | 2                                  | 2                         | 3.0                              | 5         | 54        | Mod                     | 9                         | 2.9                              | -                       |
|                                      | #17 | +             | NR                        | Poorly                         | Poorly                   | 3                                  | 1                         | 1.0                              | 5         | 55        | Mod                     | 1                         | 1.3                              | +                       |
|                                      | #18 | +             | 1.5                       | Poorly                         | Poorly                   | 2                                  | 3                         | 0.5                              | 9.9       | 415       | Mod                     | 2                         | 6.3                              | +                       |
|                                      | #19 | +             | NR                        | Poorly                         | Poorly                   | 2                                  | 2                         | 3.0                              | 11.2      | 13        | Mod                     | 4                         | 3.3                              | -                       |
|                                      | #20 | +             | NR                        | Poorly                         | Poorly                   | 2                                  | 1                         | 1.8                              | 19.8      | 355       | Mod                     | 8                         | 1.6                              | -                       |
|                                      | #21 | +             | NR                        | Poorly                         | Poorly                   | 2                                  | 2                         | 2.0                              | 36.5      | 17        | Mod                     | 7                         | 1.9                              | -                       |
|                                      | #22 | +             | NR                        | Poorly                         | Poorly                   | 2                                  | 3                         | 2.5                              | 248.9     | 580       | Mod                     | 6                         | 2.4                              | +                       |
|                                      | #23 | +             | NR                        | Poorly                         | Poorly                   | 2                                  | 3                         | 2.3                              | 251       | 82        | Mod                     | 5                         | 2.2                              | +                       |
| Radiologically beyond Milan criteria | #24 | -             | NR                        | Poorly                         | Highly                   | 2                                  | 8                         | 2.0                              | 102.4     | 67        | Mod                     | 8                         | 3.0                              | -                       |
|                                      | #25 | -             | 2.7                       | Highly                         | Poorly                   | 2                                  | 1                         | 8.0                              | 7.5       | 25        | Mod                     | 1                         | 8.4                              | -                       |
|                                      | #26 | -             | 0.9                       | Poorly                         | Poorly                   | 2                                  | 1                         | 2.5                              | 735       | 10        | Mod                     | 5                         | 2.0                              | +                       |
|                                      | #27 | -             | NR                        | Poorly                         | Poorly                   | 2                                  | 10                        | 1.6                              | 5         | 17        | Necrosis                | 0                         | 0.0                              | -                       |
|                                      | #28 | +             | 2.1                       | Highly                         | Highly                   | 1                                  | 8                         | 1.5                              | 81.3      | 78        | Well                    | 10                        | 1.5                              | -                       |
|                                      | #29 | +             | 3.1                       | Poorly                         | Highly                   | 2                                  | 1                         | 2.0                              | 5.5       | 304       | Por                     | 11                        | 2.2                              | -                       |
|                                      | #30 | +             | NR                        | Poorly                         | Highly                   | 2                                  | 10                        | 2.2                              | 53.2      | 928       | Mod                     | 15                        | 3.5                              | -                       |
|                                      | #31 | +             | 1.8                       | Poorly                         | Poorly                   | 2                                  | 3                         | 5.0                              | 5.4       | 157       | Mod                     | 7                         | 4.0                              | -                       |
|                                      | #32 | +             | 0.9                       | Poorly                         | Poorly                   | 2                                  | 8                         | 3.0                              | 5         | 640       | Mod                     | 5                         | 3.5                              | -                       |
|                                      | #33 | +             | NR                        | Poorly                         | Poorly                   | 2                                  | 2                         | 3.8                              | 18.2      | 150       | Mod                     | 2                         | 3.5                              | -                       |
|                                      | #34 | +             | NR                        | Poorly                         | Poorly                   | 2                                  | 15                        | 2.6                              | 991.2     | 75        | Por                     | 10                        | 2.9                              | +                       |

# Figure S1

## Liver NK cells in liver perfusates (gated on CD56+ CD3-)

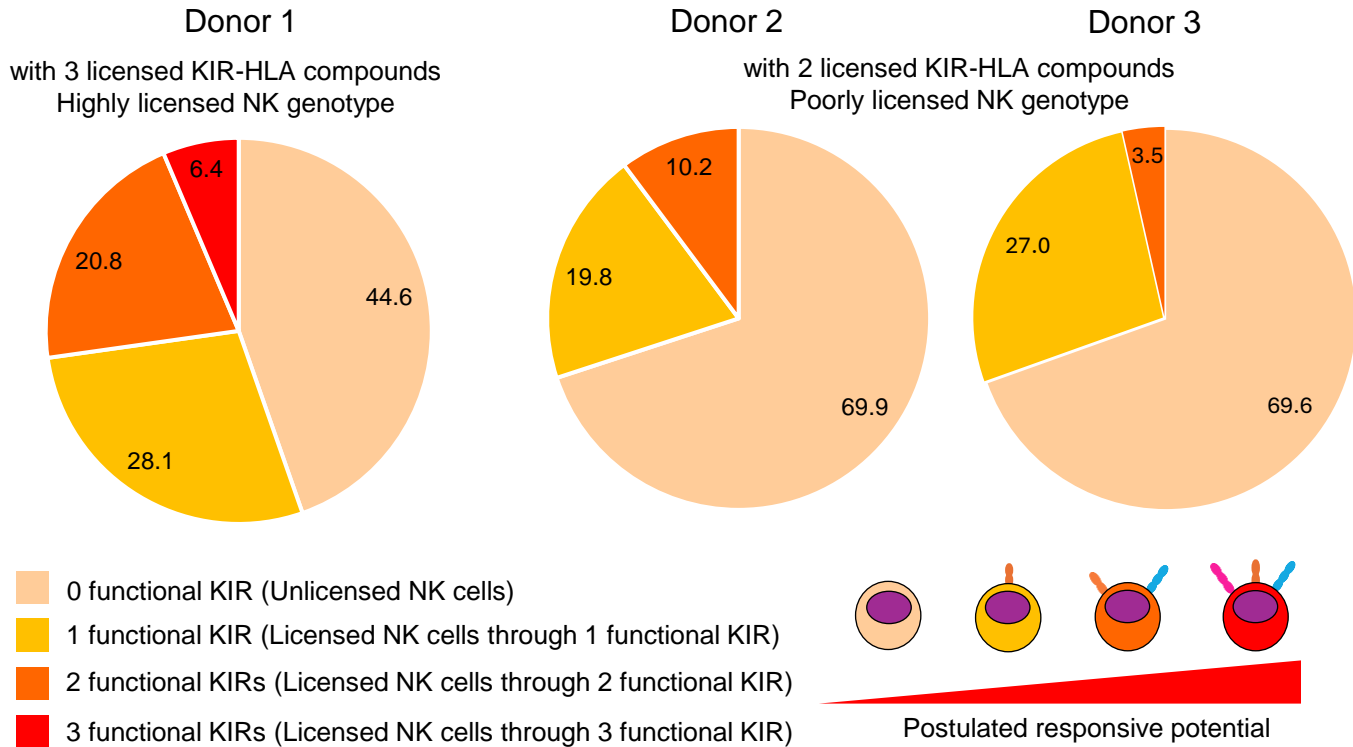

Figure S1; Liver NK cells from the donor with highly licensed NK genotype were enriched with highly licensed NK cells in KIR expression level  
Multi-color flow cytometry analysis revealed that liver NK cells from the donor with highly licensed NK genotype (donor 1) was enriched with highly licensed NK cells confirmed by KIR expression level compared with those from poorly licensed NK genotype (donor 2 and 3).

Figure S2

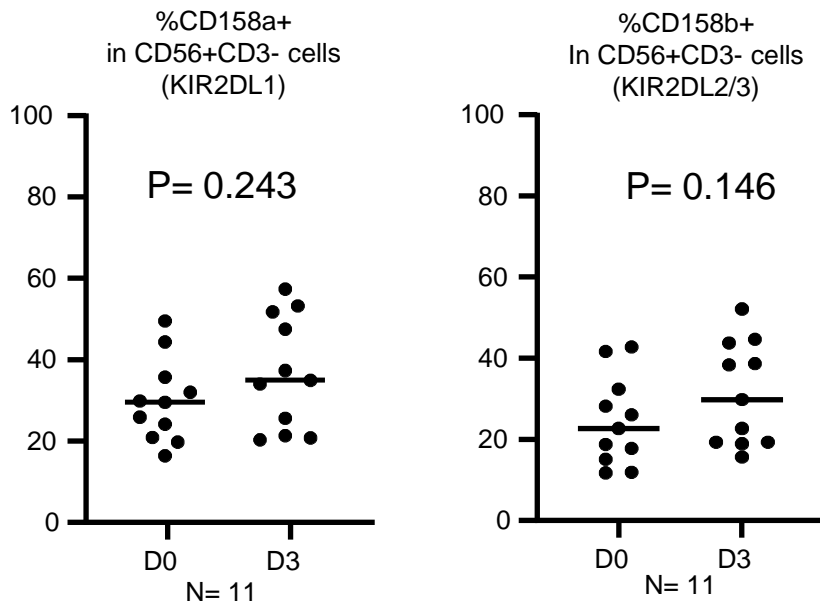

Figure S2; KIR expression in liver NK cells was preserved after 3 days of stimulation with IL-2.

Dot plots showed the % positive of CD158a (left) and CD158b (right) in CD56+ CD3- NK cells before (D0) and after 3 days IL-2 activation (D3) assessed by flow cytometry. Statistical analyses were performed by Wilcoxon tests.
